# Supplementary material for: Wide channel broadband CH3NH3PbI3/SnS hybrid photodetector: breaking the limit of bandgap energy operation
Source: Royal Society of Chemistry journal article supplement (doi:10.1039/c8ra02825g), 2018-01-01
Supplement: c8ra02825g1.pdf [file c8ra02825g1.pdf]

## Supplementary information

### Wide Channel Broadband CH<sub>3</sub>NH<sub>3</sub>PbI<sub>3</sub>/SnS Hybrid Photodetector: Breaking the Limit of Bandgap Energy Operation

*Mohit Kumar<sup>†, ^</sup>, Hong-Sik Kim,<sup>†, ^, #</sup> Dae Young Park<sup>#</sup>, Mun Seok Jeong <sup>#</sup> and Joondong Kim<sup>\*, †, ^</sup>*

<sup>†</sup> Photoelectric and Energy Device Application Lab (PEDAL), Multidisciplinary Core Institute for Future Energies (MCIFE), Incheon National University, 119 Academy Rd. Yeonsu, Incheon, 22012, Republic of Korea

<sup>^</sup> Department of Electrical Engineering, Incheon National University, 119 Academy Rd. Yeonsu, Incheon, 22012, Republic of Korea

<sup>#</sup> Department of Energy Science, Sungkyunkwan University, Suwon 16419, Republic of Korea

*E-mail: \*J. Kim ([joonkim@incheon.ac.kr](mailto:joonkim@incheon.ac.kr))*

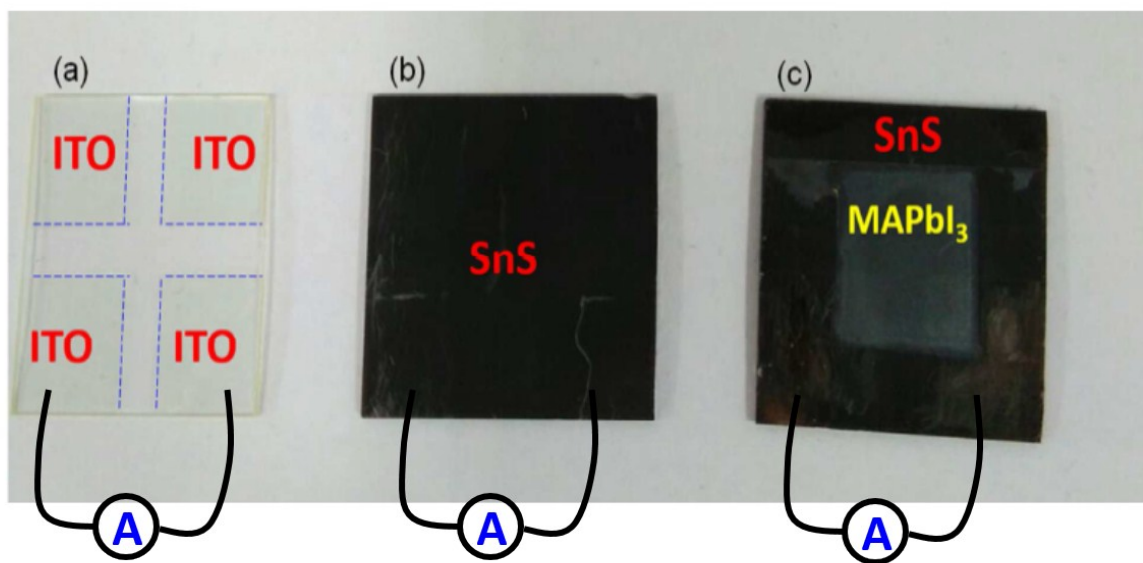

**Figure S1.** A photograph of the device. (a) The cross-shape patterned ITO, (b) SnS on patterned ITO, (c) Perovskite on top of the device.

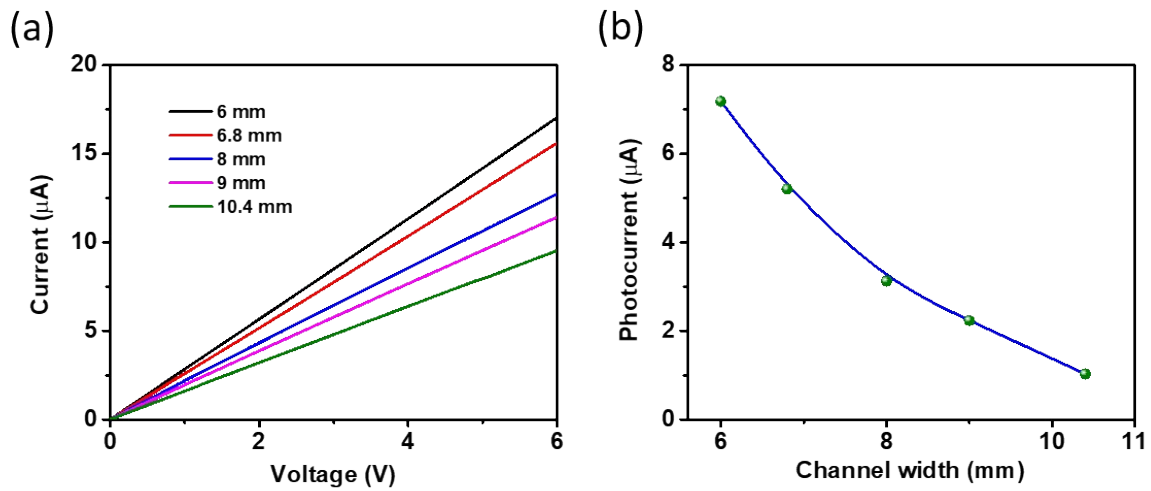

**Figure S2.** a) Dark  $I-V$  characteristics of the  $\text{CH}_3\text{NH}_3\text{PbI}_3/\text{SnS}$  device with different channel widths, b) The change in the photocurrent as a function of channel width.
